# Supplementary material
Source: publisher figshare collection journal article supplement (https://rs.figshare.com/ndownloader/files/14668574)
Supplement: Supplementary file 1 [file 14668574]

,FAD,LAD
Mesosaurus_tenuidens,290.1,279.5
Stereosternum_tumidum,290.1,279.5
Brazilosaurus_sanpauloensis,290.1,279.5
Milleretta_rubidgei,254,252.3
Broomia_perplexa,265,259
Milleropsis_pricei,259,252.3
Millerosaurus_nuffieldi,259,252.3
Millerosaurus_ornatus,259,252.3
Erpetonyx_arsenaultorum,303.4,298.9
Eudibamus_cursoris,290.1,279.5
Belebey_vegrandis,268,265
Belebey_maximi,268,265
Belebey_chengi,272.5,268
Bolosaurus_grandis,289.2,286.2
Bolosaurus_striatus,290.1,279.5
Australothyris_smithi,265,261.2
Acleistorhinus_pteroticus,279.5,272.5
Chalcosaurus_rossicus,268,265
Lanthaniscus_efremovi,272.5,265
Lanthanosuchus_watsoni,268,252.3
Delorhynchus_priscus,289.2,286.2
Delorhynchus_cifellii,289.2,286.2
Colobomycter_pholeter,289.2,286.2
Colobomycter_vaughni,289.2,286.2
Feeserpeton_oklahomensis,289.2,286.2
Microleter_mckinzieorum,289.2,286.2
Nyctiphruretus_acudens,272.5,265
Abyssomedon_williamsi,289.2,286.2
Barasaurus_besairei,252.3,247.2
Saurodektes_rogersorum,252.3,251.3
Ruhuhuaria_reiszi,247.2,242
Candelaria_barbouri,242,235
Owenetta_rubidgei,259,254
Owenetta_kitchingorum,252.3,251.3
Kitchingnathus_untabeni,251.3,247.2
Phaanthosaurus_ignatjevi,252.3,251.3
Sauropareion_anoplus,252.3,247.2
Pintosaurus_magnidentis,235,201.6
Coletta_seca,251.3,247.2
Theledectes_perforatus,247.2,242
Eumetabolodon_dongshengensis,252.3,247.2
Contritosaurus_simus,252.3,251.3
Tichvinskia_vjatkensis,251.3,247.2
Pentaedrusaurus_ordosianus,251.3,242
Neoprocolophon_asiaticus,247.2,242
Phonodus_dutoitorum,252.3,251.3
Mandaphon_nadra,247.2,242
Scoloparia_glyphanodon,235,221.5
Sclerosaurus_armatus,247.2,242
Soturnia_caliodon,221.5,205.6
Hypsognathus_fenneri,221.5,201.6
Leptopleuron_lacertinum,235,205.6
Eumetabolodon_bathycephalus,247.2,242
Procolophon_trigoniceps,251.3,247.2
Thelerpeton_oppressus,247.2,242
Teratophon_spinigensis,247.2,242
Timanophon_raridentatus,251.3,247.2
Thelephon_contritus,247.2,242
Anomoiodon_liliensterni,247.2,242
Kapes_amaenus,251.3,247.2
Kapes_betoni,247.2,242
Kapes_komiensis,251.3,247.2
Kapes_majmesculae,251.3,247.2
Bradysaurus_baini,265,261.2
Bradysaurus_seeleyi,265,261.2
Nochelesaurus_alexandri,265.1,259.1
Embrithosaurus_schwarzi,265.1,259.1
Bunostegos_akokanensis,254,252.3
Deltavjatia_vjatkensis,265,252.3
Parasaurus_geinitzi,259,254
Honania_complicidentata,259,254
Shihtienfenia_permica,254,252.3
Pareiasuchus_nasicornis,259,254
Pareiasuchus_peringueyi,259,254
Obirkovia_gladiator,259,252.3
Shansisaurus_xuecunensis,254,252.3
Scutosaurus_karpinskii,265,254
Pareiasaurus_serridens,259,254
Arganaceras_vacanti,259,254
Elginia_mirabilis,254,252.3
Nanoparia_luckhoffi,259,254
Provelosaurus_americanus,268,259
Pumiliopareia_pricei,259,254
Anthodon_serrarius,259,254
Bashkyroleter_mesensis,272.5,265
Bashkyroleter_bashkyricus,268,265
Macroleter_poezicus,268,265
Macroleter_agilis,272.5,265
Nycteroleter_ineptus,272.5,265
Rhipaeosaurus_tricuspidens,268,265
Emeroleter_levis,265,252.3
